# Supplementary material
Source: HighWire-hosted journal article supplement (https://erj.ersjournals.com/highwire/filestream/113203/field_highwire_adjunct_files/1/TABLE_1.docx)
Supplement: TABLE_1.docx [file TABLE_1.docx]

TABLE 1 Characteristics and antibiotic treatment of patients with acute cough by network

| **Network** | **Patients** | **Clinicians** | **Temperature** | | | **Age yrs** | **Time waited days** | **Comorbidity** | | | | **Sputum colour** | | **Feeling generally unwell** | | | **Antibiotics prescribed** |
| --- | --- | --- | --- | --- | --- | --- | --- | --- | --- | --- | --- | --- | --- | --- | --- | --- | --- |
| **Normal** | **<36°C** | **>37.2°C** | **Diabetes** | **Respiratory** | **Cardiovascular** | **COPD** | **Yellow** | **Green** | **Mild** | **Moderate** | **Severe** |
| **Cardiff, UK** | 173 | 22 | 114 (65.9) | 36 (20.8) | 23 (13.3) | 50.0 (38.0–61.0) | 7 (5–10) | 13 (7.5) | 39 (22.5) | 15 (8.7) | 9 (5.2) | 37 (21.4) | 37.6 (65) | 42 (24.3) | 82 (47.4) | 34 (19.7) | 125 (72.3) |
| **Southampton, UK** | 139 | 22 | 112 (80.6) | 10 (7.2) | 17 (12.2) | 47.0 (37.5–56.5) | 9 (6–16) | 6 (4.3) | 24 (17.3) | 11 (7.9) | 2 (1.4) | 25 (18) | 34.5 (48) | 44 (31.7) | 60 (43.2) | 18 (12.9) | 90 (64.7) |
| **Utrecht, the Netherlands** | 155 | 31 | 90 (58.1) | 45 (29.0) | 20 (12.9) | 56.0 (43.0–67.0) | 10 (7–16) | 13 (8.4) | 40 (25.8) | 19 (12.3) | 19 (12.3) | 32 (20.6) | 25.8 (40) | 35 (22.6) | 55 (35.5) | 12 (7.7) | 68 (43.9) |
| **Barcelona, Spain** | 153 | 25 | 96 (62.7) | 30 (19.6) | 27 (17.6) | 45.0 (33.0–61.0) | 6 (4–9) | 6 (3.9) | 16 (10.5) | 9 (5.9) | 3 (2) | 21 (13.7) | 19.6 (30) | 72 (47.1) | 28 (18.3) | 3 (2) | 30 (19.6) |
| **Mataro, Spain** | 162 | 19 | 100 (61.7) | 36 (22.2) | 26 (16.0) | 45.0 (29.25–63.0) | 7 (5–9) | 10 (6.2) | 27 (16.7) | 13 (8) | 12 (7.4) | 34 (21) | 22.2 (36) | 55 (34.0) | 36 (22.2) | 4 (2.5) | 60 (37) |
| **Rotenburg, Germany** | 171 | 19 | 98 (57.3) | 49 (28.7) | 24 (14.0) | 41.0 (28.5–53.0) | 6 (5–9) | 9 (5.3) | 23 (13.5) | 10 (5.8) | 8 (4.7) | 49 (28.7) | 17.5 (30) | 26 (15.2) | 69 (40.4) | 37 (21.6) | 58 (33.9) |
| **Balatonfured, Hungary** | 319 | 11 | 129 (40.4) | 35 (11.0) | 155 (48.6) | 39.0 (26.0–50.0) | 4 (4–5.5) | 13 (4.1) | 25 (7.8) | 26 (8.2) | 18 (5.6) | 108 (33.9) | 6.9 (22) | 133 (41.7) | 126 (39.5) | 18 (5.6) | 239 (74.9) |
| **Antwerp, Belgium** | 122 | 25 | 69 (56.6) | 20 (16.4) | 33 (27.0) | 46.5 (35.25–61.0) | 6 (5–9) | 3 (2.5) | 24 (19.7) | 7 (5.7) | 15 (12.3) | 37 (30.3) | 12.3 (15) | 39 (32.0) | 52 (42.6) | 14 (11.5) | 34 (27.9) |
| **Lodz, Poland** | 218 | 21 | 100 (45.9) | 77 (35.3) | 41 (18.8) | 43.0 (29.0–55.0) | 6 (5.8) | 7 (3.2) | 28 (12.8) | 36 (16.5) | 16 (7.3) | 63 (28.9) | 9.2 (20) | 42 (19.3) | 121 (55.5) | 37 (17) | 158 (72.5) |
| **Milan, Italy** | 141 | 12 | 101 (71.6) | 15 (10.6) | 25 (17.7) | 42.0 (35.0–59.0) | 7 (5–10) | 5 (3.5) | 14 (9.9) | 8 (5.7) | 7 (5) | 43 (30.5) | 5.7 (8) | 51 (36.2) | 39 (27.7) | 9 (6.4) | 111 (78.7) |
| **Jönköping, Sweden** | 183 | 66 | 95 (51.9) | 40 (21.9) | 48 (26.2) | 51.0 (37.0–61.0) | 11 (8–17) | 8 (4.4) | 25 (13.7) | 7 (3.8) | 5 (2.7) | 66 (36.1) | 15.3 (28) | 32 (17.5) | 90 (49.2) | 50 (27.3) | 69 (37.7) |
| **Tromsø, Norway** | 137 | 38 | 83 (60.6) | 34 (24.8) | 20 (14.6) | 49.0 (37.0–56.0) | 9 (6–12) | 9 (6.6) | 25 (18.2) | 10 (7.3) | 11 (8) | 32 (23.4) | 30.7 (42) | 32 (23.4) | 66 (48.2) | 8 (5.8) | 42 (30.7) |
| **Helsinki, Finland** | 83 | 25 | 56 (67.5) | 15 (18.1) | 12 (14.5) | 45.0 (33.0–54.5) | 9 (6–16) | 2 (2.4) | 10 (12) | 3 (3.6) | 2 (2.4) | 29 (34.9) | 24.1 (20) | 19 (22.9) | 27 (32.5) | 3 (3.6) | 38 (45.8) |
| **Bratislava, Slovakia** | 263 | 23 | 150 (57.0) | 8 (3.0) | 105 (39.9) | 38.0 (26.0–49.0) | 6 (5–8) | 9 (3.4) | 29 (11) | 38 (14.4) | 10 (3.8) | 62 (23.6) | 17.9 (47) | 112 (42.6) | 96 (36.5) | 12 (4.6) | 232 (88.2) |

Data are presented as n, n (%) or median (interquartile range). COPD: chronic obstructive pulmonary disease.
